# Supplementary material for: Cross section measurements of 151Eu(3He,5n) reaction: new opportunities for medical alpha emitter 149Tb production
Source: PubMed Central journal article supplement (PMC6965643; doi:10.1038/s41598-020-57436-6), 2020-01-16
Supplement: 41598_2020_57436_MOESM1_ESM.pdf [file 41598_2020_57436_MOESM1_ESM.pdf]

# Cross section measurements of $^{151}\text{Eu}(^3\text{He},5\text{n})$ reaction: new opportunities for medical alpha emitter $^{149}\text{Tb}$ production

A.N. Moiseeva, R.A. Aliev, V.N. Unezhev, V.A. Zagryadskiy, S.T. Latushkin, N.V. Aksenov, N.S. Gustova, M.G. Voronuk, G.Ya. Starodub, A.A. Ogloblin

## Supplementary information

Supplementary Table S1. Measured cross sections for  $^{151}\text{Eu}(^3\text{He},x\text{n})^{154-x}\text{Tb}$  reactions

| $^3\text{He}$ energy,<br>MeV | Reaction Cross-section (mb)                             |                                                         |                                                         |                                                         |
|------------------------------|---------------------------------------------------------|---------------------------------------------------------|---------------------------------------------------------|---------------------------------------------------------|
|                              | $^{151}\text{Eu}(^3\text{He};5\text{n})^{149}\text{Tb}$ | $^{151}\text{Eu}(^3\text{He};4\text{n})^{150}\text{Tb}$ | $^{151}\text{Eu}(^3\text{He};3\text{n})^{151}\text{Tb}$ | $^{151}\text{Eu}(^3\text{He};2\text{n})^{152}\text{Tb}$ |
| 69.8±1.1                     | 12.3±2.5                                                | 10.8±7.4                                                | 13.0±3.1                                                | 3.2±1.0                                                 |
| 66.2±1.2                     | 13.1±2.6                                                | 10.1±12.1                                               | 15.6±5.8                                                | 3.5±1.6                                                 |
| 63.7±1.3                     | 17.5±3.5                                                | 23.6±13.2                                               | 15.5±5.2                                                | 4.0±1.4                                                 |
| 60.9±1.4                     | 18.1±3.6                                                | 22.3±10.3                                               | 20.5±5.6                                                | 4.4±1.4                                                 |
| 58.7±1.5                     | 26.2±5.2                                                | 27.1±14.5                                               | 21.6±5.9                                                | 4.0±1.4                                                 |
| 56.1±1.5                     | 34.9±7.0                                                | 11.6±11.4                                               | 25.5±5.7                                                | 3.6±1.1                                                 |
| 53.5±1.6                     | 43.3±8.7                                                | 15.3±15.7                                               | 28.8±5.7                                                | 6.5±1.4                                                 |
| 51.0±1.6                     | 56.2±11.2                                               | 26.1±17.2                                               | 37.1±8.9                                                | 7.7±1.8                                                 |
| 48.2±1.8                     | 69.8±14.0                                               | 46.9±18.8                                               | 42.9±9.2                                                | 10.7±2.1                                                |
| 46.1±1.9                     | 46.8±9.4                                                | 78.0±23.9                                               | 44.3±9.0                                                | 11.7±2.2                                                |
| 44.8±1.1                     | 66.1±13.2                                               | 61.8±9.8                                                | 52.4±7.8                                                | 11.5±1.7                                                |
| 40.1±1.4                     | 63.1±12.6                                               | 97.9±16.1                                               | 52.8±8.1                                                | 14.8±2.3                                                |
| 35.0±1.6                     | 15.3±3.1                                                | 205.0±28.5                                              | 96.7±13.0                                               | 19.4±2.8                                                |
| 31.2±1.8                     | 0.4±0.1                                                 | 191.5±26.9                                              | 163.8±21.5                                              | 19.0±2.7                                                |
| 26.9±2.1                     | 0.0                                                     | 91.9±13.7                                               | 330.2±42.0                                              | 22.9±3.1                                                |
| 22.0±2.6                     | 0.0                                                     | 0.0                                                     | 256.3±32.5                                              | 32.7±4.3                                                |
| 16.2±3.4                     | 0.0                                                     | 0.0                                                     | 14.4±3.1                                                | 25.0±3.2                                                |
| 12.0±4.3                     | 0.0                                                     | 0.0                                                     | 0.0                                                     | 0.8±1.2                                                 |

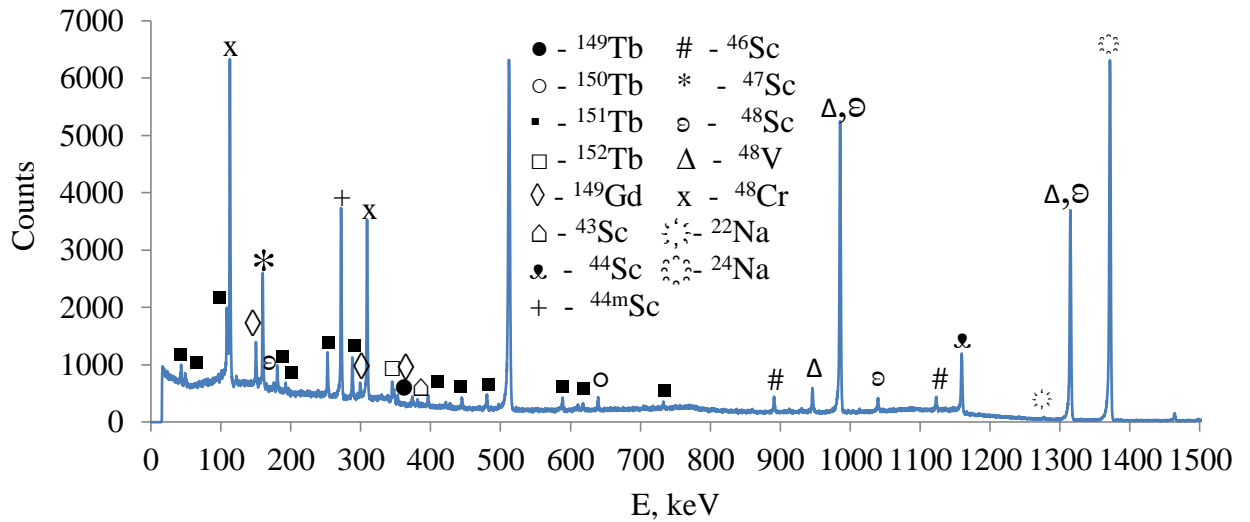

Supplementary Fig. S1. Typical Gamma-ray spectrum of  $^{151}\text{Eu}$  target irradiated by  $^3\text{He}$  nuclei with incident energy  $\sim 45$  MeV, measured at  $\sim 6$  cm distance during 1.5 h 5 h after EOB.

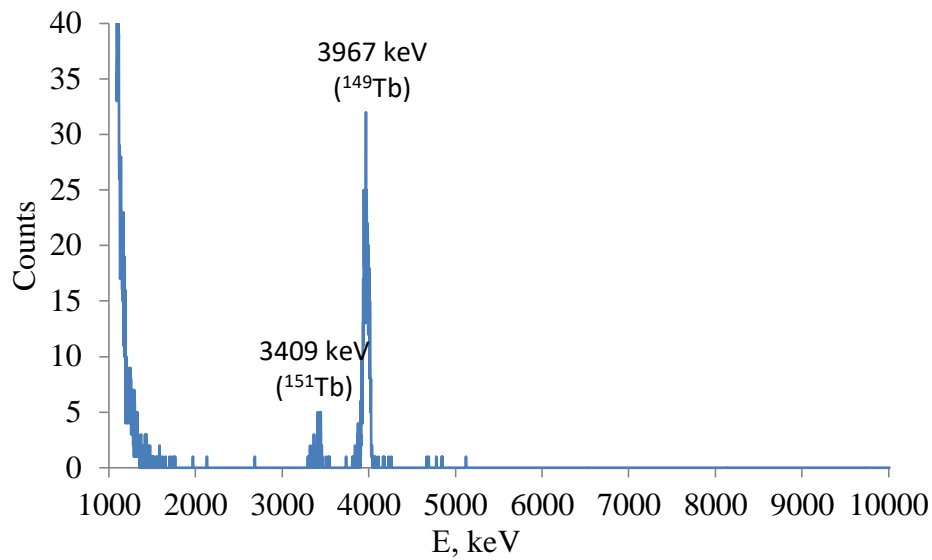

Supplementary Fig. S2. Typical Alpha particle spectrum of  $^{151}\text{Eu}$  target irradiated by  $^3\text{He}$  nuclei with incident energy  $\sim 40$  MeV, measured at  $\sim 2$  cm distance during 1.25 h 22 h after EOB.

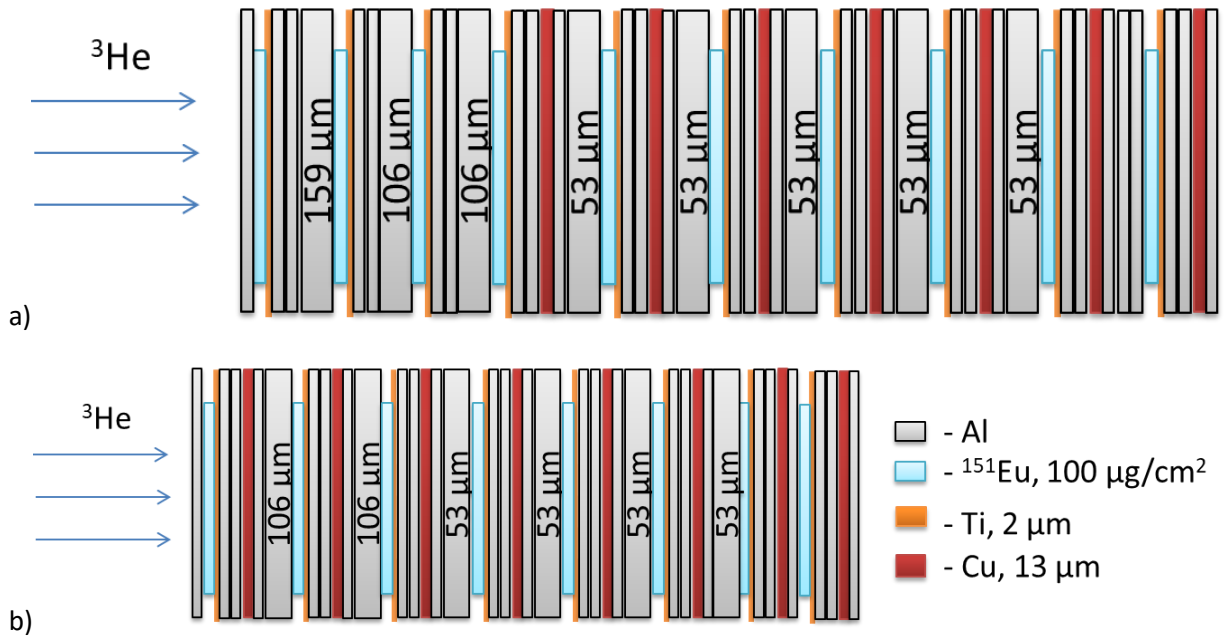

Supplementary Fig. S3. Stack configurations of target foils on the first irradiation (a) and the second (b).

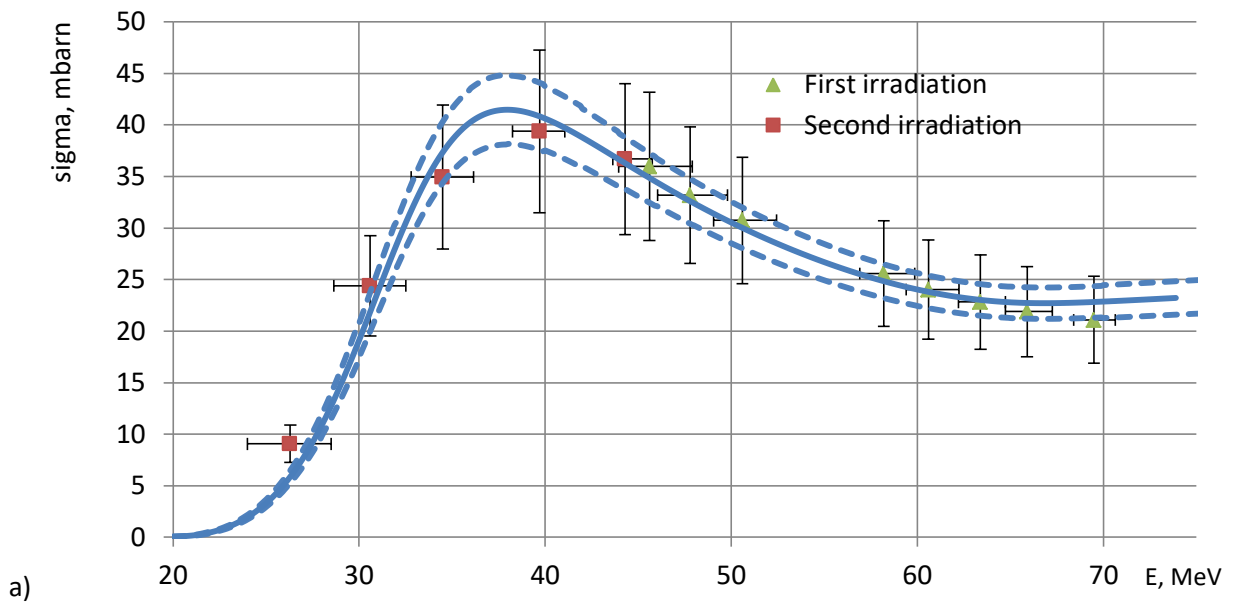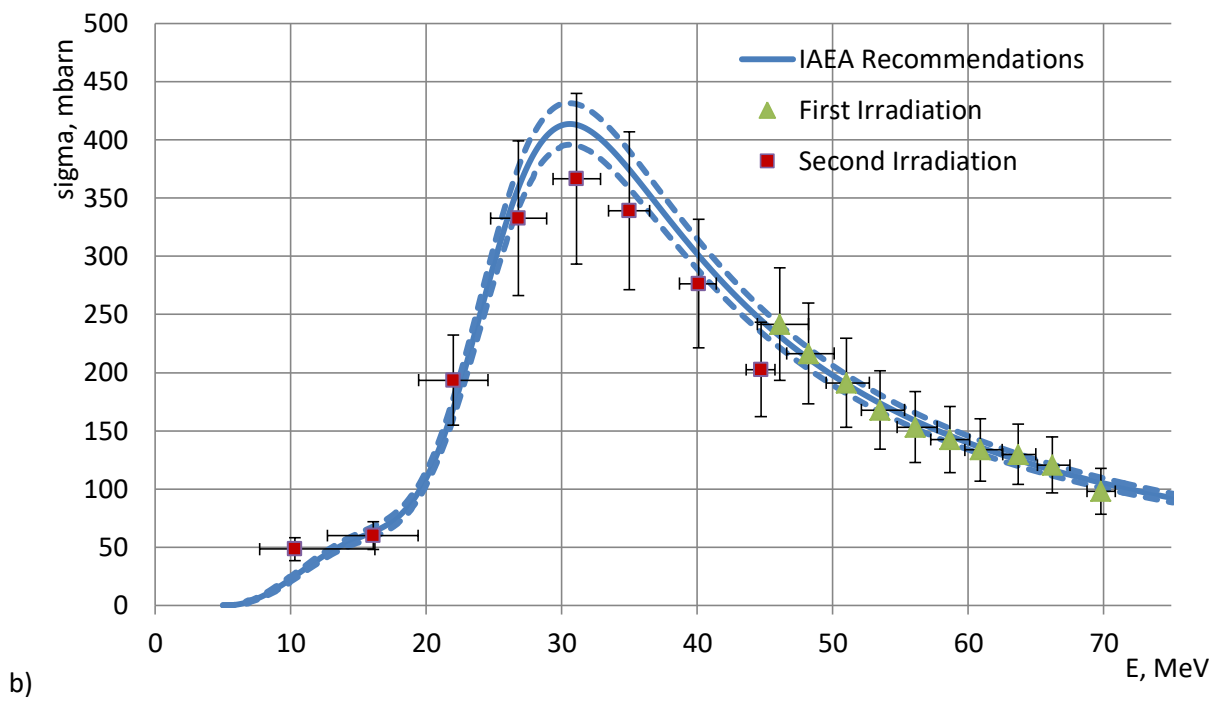

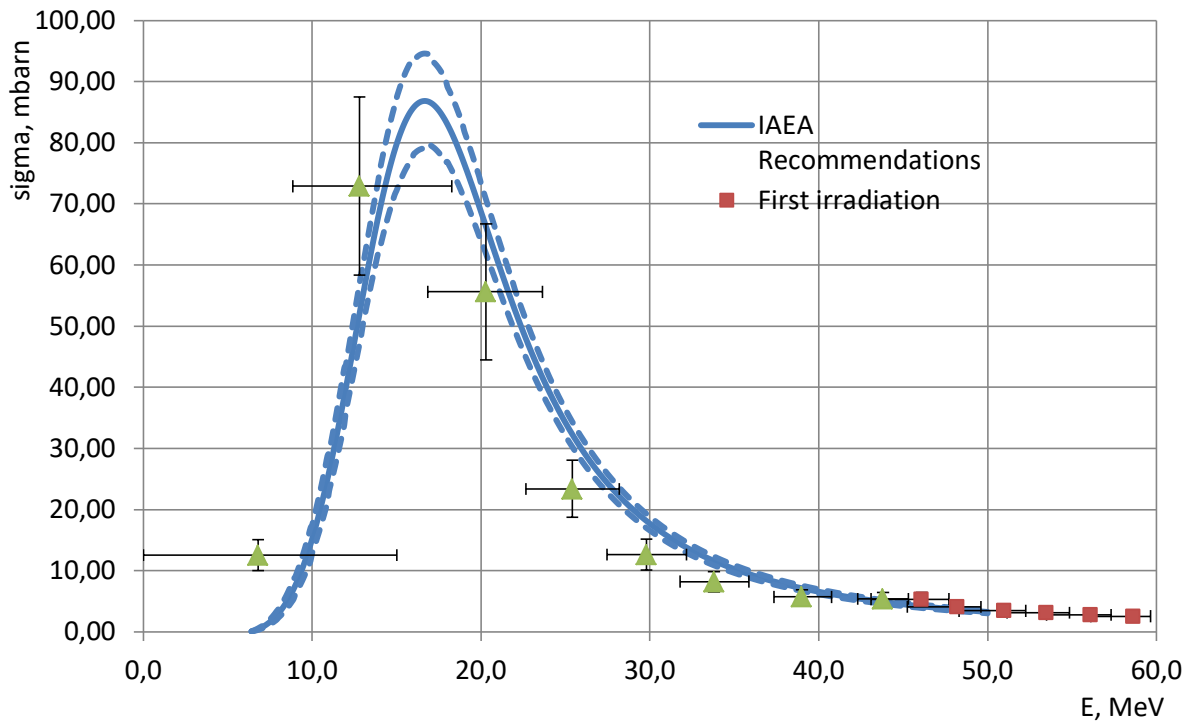

c)

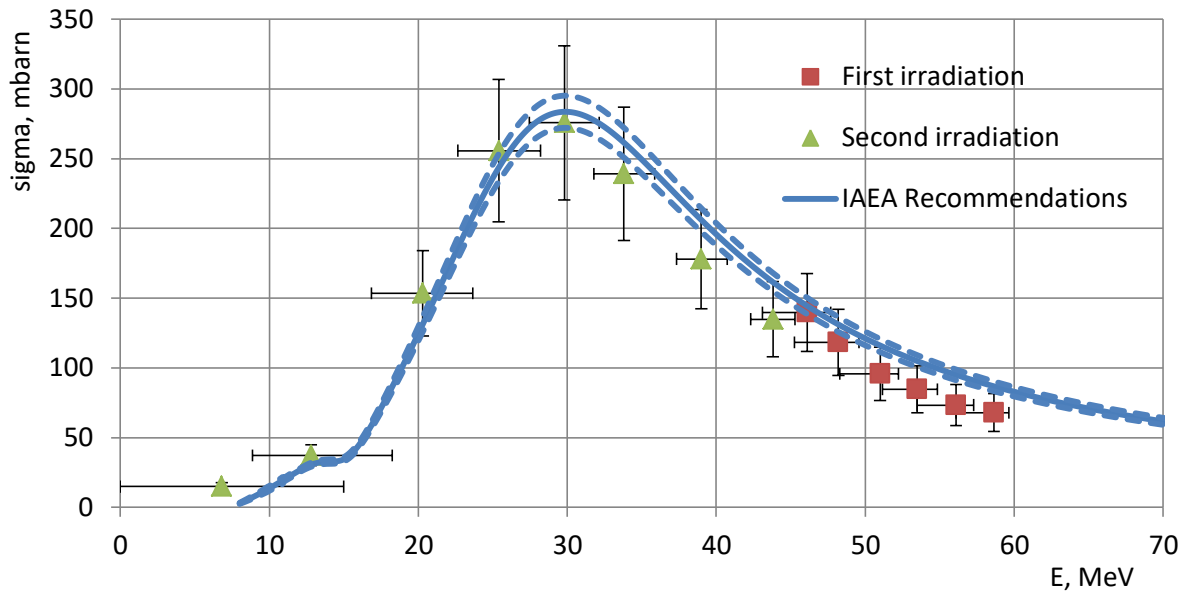

d)

Supplementary fig. S4. Energy control through monitor reactions: a)  $^{27}\text{Al}(^3\text{He},x)^{24}\text{Na}$ ; b)  $^{\text{nat}}\text{Ti}(^3\text{He},x)^{48}\text{V}$ ; c)  $^{\text{nat}}\text{Cu}(^3\text{He},x)^{66}\text{Ga}$ ; d)  $^{\text{nat}}\text{Cu}(^3\text{He},x)^{65}\text{Zn}$
